# Supplementary material for: Analysis of Different Binding Modes for Tiagabine within the GAT-1 Transporter
Source: MDPI journal article supplement (doi:10.3390/biom12111663), 2022-11-09
Supplement: s1 [file s1]

*Supplementary information*

# **Analysis of Different Binding Modes for Tiagabine within the GAT-1 Transporter**

**Kamil Łątka and Marek Bajda \***

Department of Physicochemical Drug Analysis, Faculty of Pharmacy, Jagiellonian University Medical College,  
Medyczna 9, 30-688 Cracow, Poland

\* Correspondence: Correspondence: [marek.bajda@uj.edu.pl](mailto:marek.bajda@uj.edu.pl)

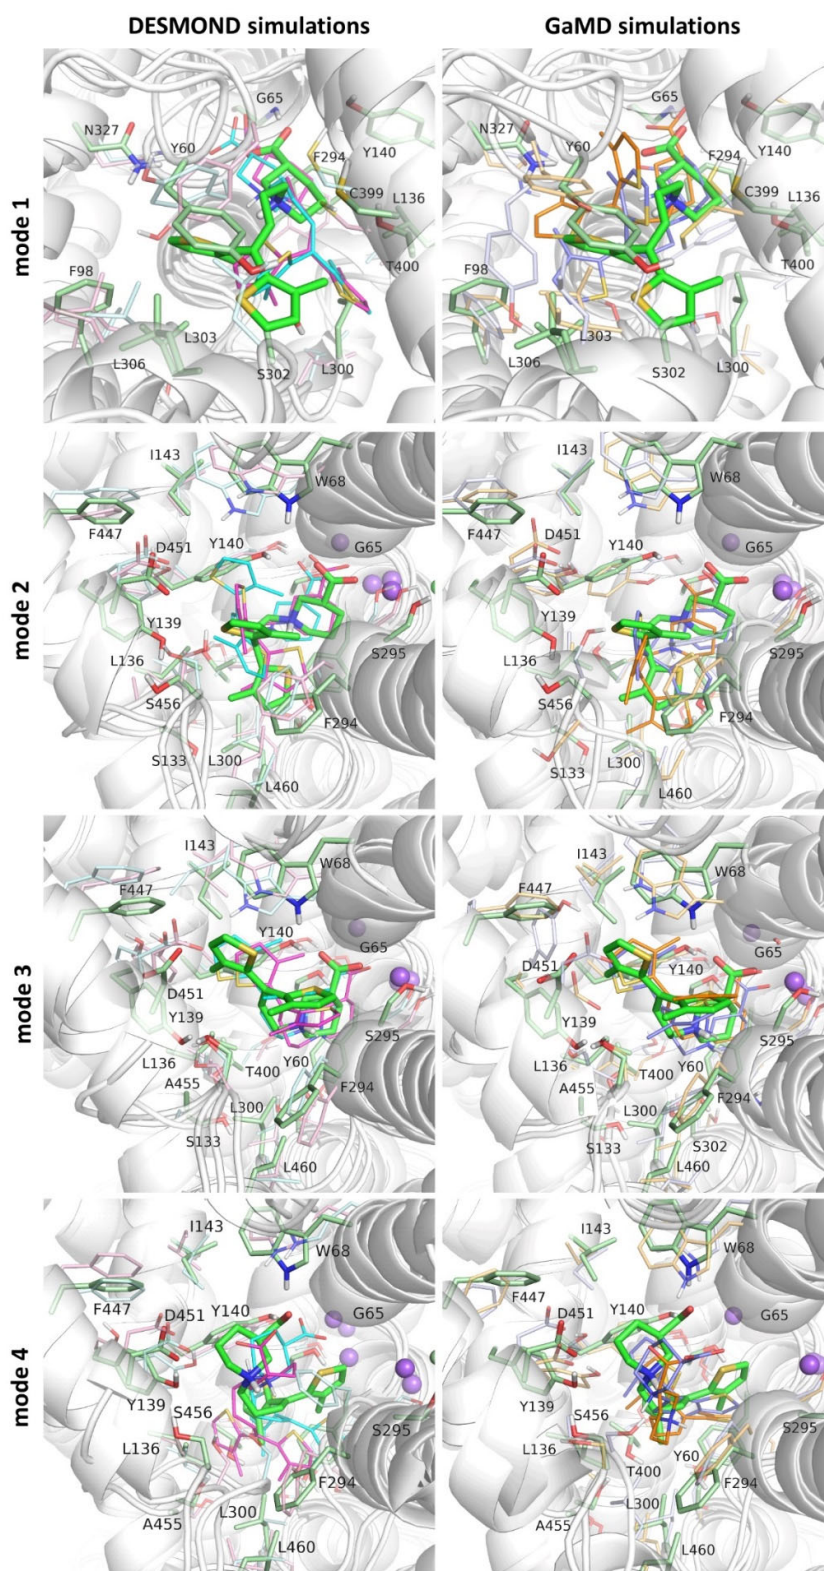

**Figure S1.** Investigated binding modes of tiagabine within hGAT-1, before (green) and after MD simulations (light blue – Desmond MD 1; pink – Desmond MD 2; light purple – GaMD 1; orange – GaMD 2).

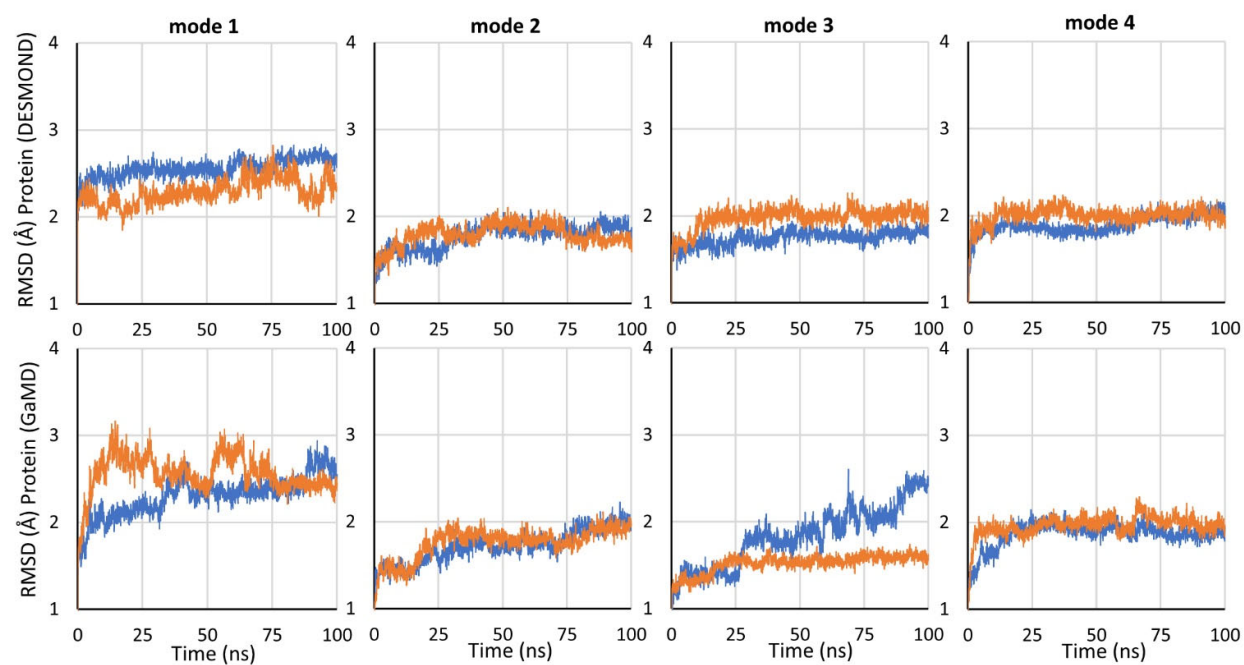

**Figure S2.** RMSD changes for hGAT-1 residues within 7 Å of tiagabine in different binding modes during molecular dynamics simulations carried out with DESMOND (classical MD) and NAMD (GaMD) programs.
